# Supplementary material
Source: publisher site journal article supplement (https://www.spandidos-publications.com/6596/downloadSupplementary)

Figure S1. Representative coronal images of contrast-enhanced CT images and three-dimensional images of fluorodeoxyglucose-positron emission tomography/CT showing the absence of cervical lymph node or distant metastasis.

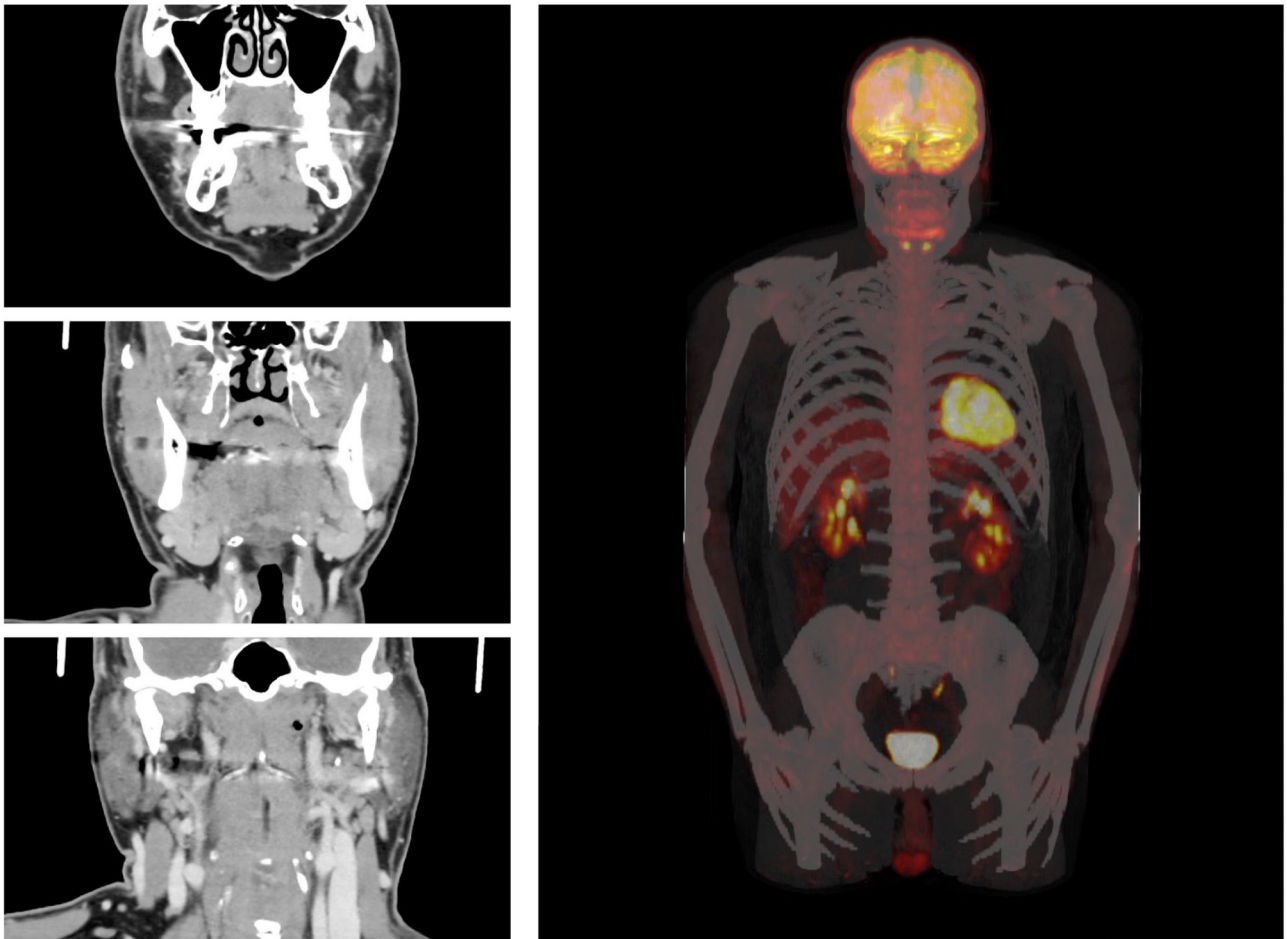

Supplement: Supplementary file 1 [file downloadSupplementary]
